# Supplementary material
Source: MDPI journal article supplement (https://www.mdpi.com/2079-9268/13/1/11)
Supplement: s1 [file s1]

## Supporting Information

### Study of nitrogen-doped carbon nanotubes for creating of piezoelectric nanogenerator

*Marina Il'ina<sup>\*</sup>, Olga Soboleva, Soslan Khubezhov, Vladimir Smirnov, Oleg Il'in*

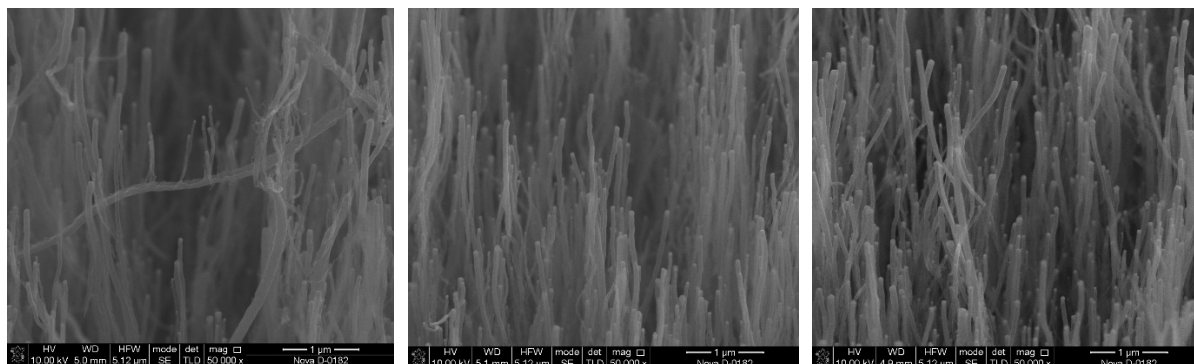

(a)

(b)

(c)

**Figure S1.** SEM images of the second series of N-CNT samples: №1 (a), №2 (b) and №3 (c)

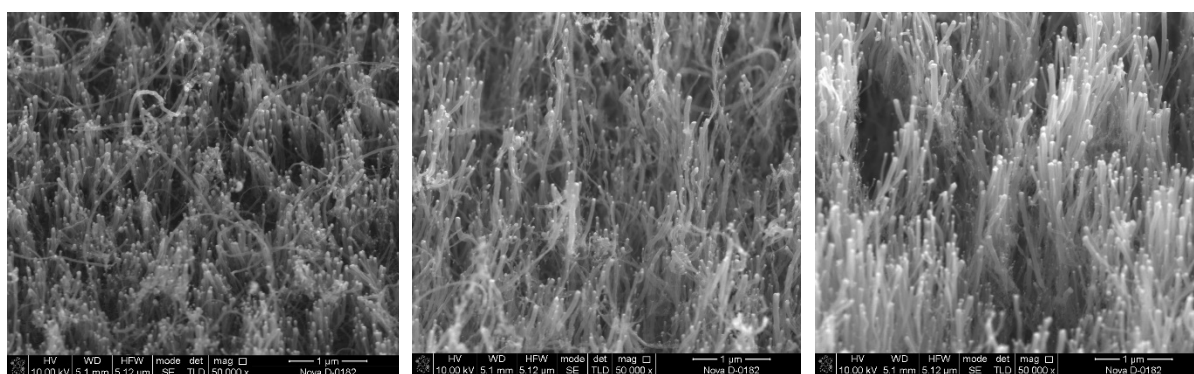

(a)

(b)

(c)

**Figure S2.** SEM images of the third series of N-CNT samples grown by the PECVD method at a plasma power of 20 (a), 40 (b), and 110 W (c)
